# Supplementary material
Source: MDPI journal article supplement (https://www.mdpi.com/2073-4433/12/4/516)
Supplement: s1 [file s1]

Supplementary Material

# Associations between Exposure to Industrial Air Pollution and Prevalence of Asthma and Atopic Diseases in Haifa Bay Area

Raanan Raz <sup>1,\*</sup>, Yuval <sup>2,3</sup>, Ruth Lev Bar-Or <sup>1</sup>, Jeremy D. Kark <sup>1,†</sup>, Ronit Sinnreich <sup>1</sup>, David M. Broday <sup>2,3</sup>, Ruthie Harari-Kremer <sup>1</sup>, Lea Bentur <sup>4</sup>, Alex Gileles-Hillel <sup>5,6,7</sup>, Lital Keinan-Boker <sup>8,9</sup>, Andrey Lyubarsky <sup>10</sup>, Dorit Tsur <sup>10</sup>, Arnon Afek <sup>11,12</sup>, Noam Levin <sup>13,14</sup>, Estela Derazne <sup>11</sup> and Gilad Twig <sup>10,11,15,16</sup>

<sup>1</sup> Braun School of Public Health and Community Medicine, The Hebrew University of Jerusalem—Hadassah, Jerusalem 9112102, Israel; ruthylev00@gmail.com (R.L.B.-O.); jeremy@mail.huji.ac.il (J.D.K.); ronits2@hadassah.org.il (R.S.); ruthie.harari-krem@mail.huji.ac.il (R.H.-K.)

<sup>2</sup> Faculty of Civil and Environmental Engineering, Technion, Haifa 3200003, Israel; lavuy@technion.ac.il (Y.); dbroday@cv.technion.ac.il (D.M.B.)

<sup>3</sup> Technion Center of Excellence in Exposure Sciences and Environmental Health (TCEEH), Haifa 3200003, Israel

<sup>4</sup> The Cystic Fibrosis Center, Rambam Medical Center, Haifa 3109601, Israel; l\_bentur@rambam.health.gov.il

<sup>5</sup> Pediatric Pulmonology Unit, Department of Pediatrics, Hadassah-Hebrew University Medical Center, Jerusalem 9112102, Israel; alexgi@hadassah.org.il

<sup>6</sup> The Wohl Institute for Translational Medicine, Hadassah-Hebrew University Medical Center, Jerusalem 9112102, Israel

<sup>7</sup> Faculty of Medicine, Hebrew University of Jerusalem, Jerusalem 9112102, Israel

<sup>8</sup> Israel Center for Disease Control, Israel Ministry of Health, Jerusalem 9446724, Israel; Lital.Keinan2@moh.gov.il

<sup>9</sup> School of Public Health, University of Haifa, Haifa 3109601, Israel

<sup>10</sup> Israel Defense Forces Medical Corps, Ramat Gan 5262000, Israel; andvika@gmail.com (A.L.); dorith48@mail.idf.il (D.T.); gilad.twig@gmail.com (G.T.)

<sup>11</sup> Sackler Faculty of Medicine, Tel Aviv University, Tel Aviv 6997801, Israel; Arnon.Afek@sheba.health.gov.il (A.A.); estelad@post.tau.ac.il (E.D.)

<sup>12</sup> Central Management, Sheba Medical Center, Tel Hashomer, Ramat Gan 5262000, Israel

<sup>13</sup> Department of Geography, The Hebrew University of Jerusalem, Jerusalem 9190501, Israel; noamlevin@mail.huji.ac.il

<sup>14</sup> Remote Sensing Research Centre, School of Earth and Environmental Sciences, University of Queensland, Brisbane, QLD 4072, Australia

<sup>15</sup> Department of Military Medicine, Faculty of Medicine, Hebrew University of Jerusalem, Jerusalem 9112102, Israel

<sup>16</sup> Institute of Endocrinology, Sheba Medical Center, Tel Hashomer, Ramat Gan 5262000, Israel

\* Correspondence: Raanan.raz@mail.huji.ac.il

† This author has passed away.

**Citation:** Raz, R.; Yuval, Bar-Or, R.L.; Kark, J.D.; Sinnreich, R.; Broday, D.M.; Harari-Kremer, R.; Bentur, L.; Gileles-Hillel, A.; Keinan-Boker, L.; et al. Associations between Exposure to Industrial Air Pollution and Prevalence of Asthma and Atopic Diseases in Haifa Bay Area. *Atmosphere* **2021**, *12*, 516. <https://doi.org/10.3390/atmos12040516>

Academic Editor: Deborah Traversi

Received: 5 March 2021

Accepted: 12 April 2021

Published: 19 April 2021

**Publisher's Note:** MDPI stays neutral with regard to jurisdictional claims in published maps and institutional affiliations.

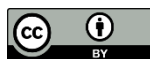

**Copyright:** © 2021 by the authors. Licensee MDPI, Basel, Switzerland. This article is an open access article distributed under the terms and conditions of the Creative Commons Attribution (CC BY) license (<http://creativecommons.org/licenses/by/4.0/>).

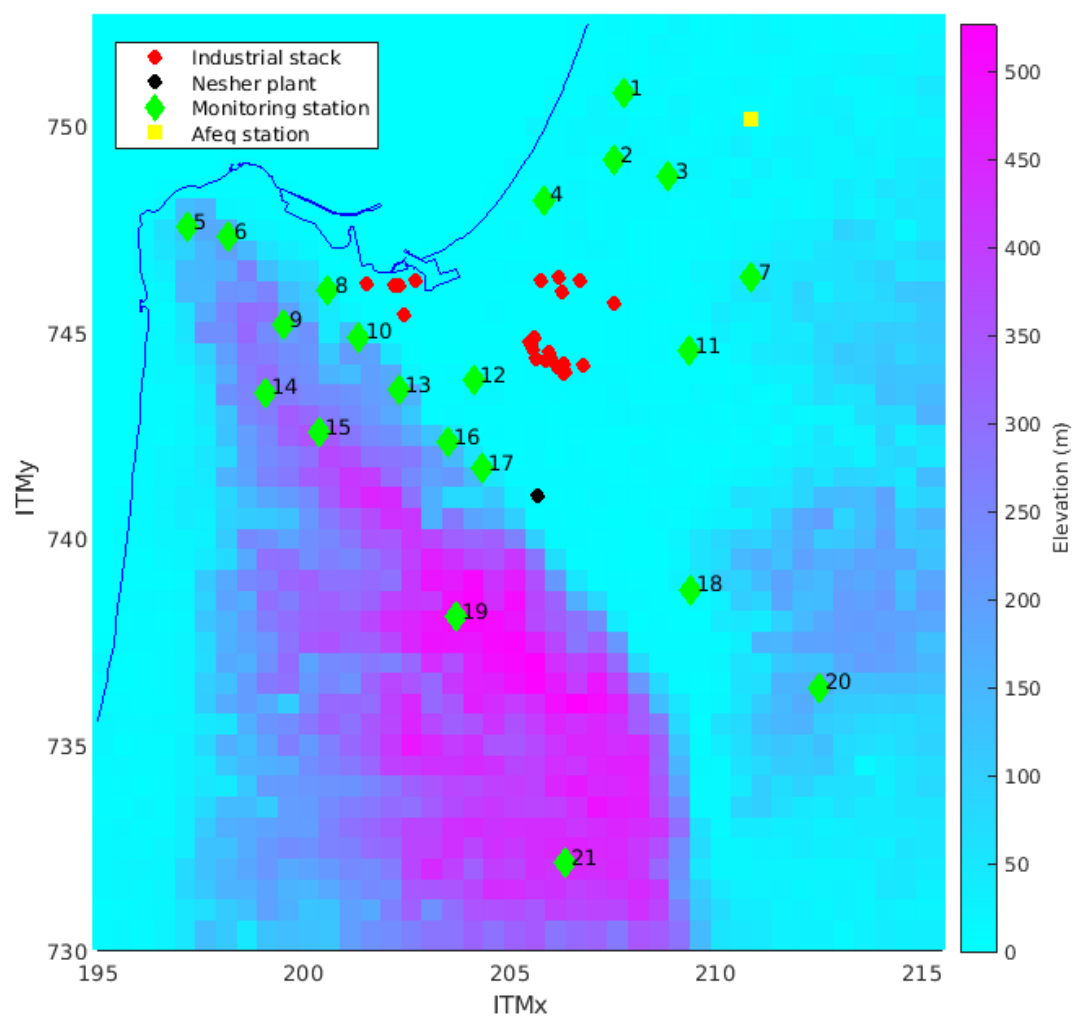

**Figure S1.** Study area map. Superimposed on the HBA elevation map are the shoreline (blue continuous line), locations of the industrial stack from the 2015 Ministry of Environmental Protection report (red circles), the site of the historical Nesher cement plant furnace (black circle), the location of the Afeq meteorological station (yellow square), and the locations and numbers of the SO<sub>2</sub> air quality monitoring stations whose data were used (green diamonds). The coordinates are in the New Israel Mercator projection (in km).

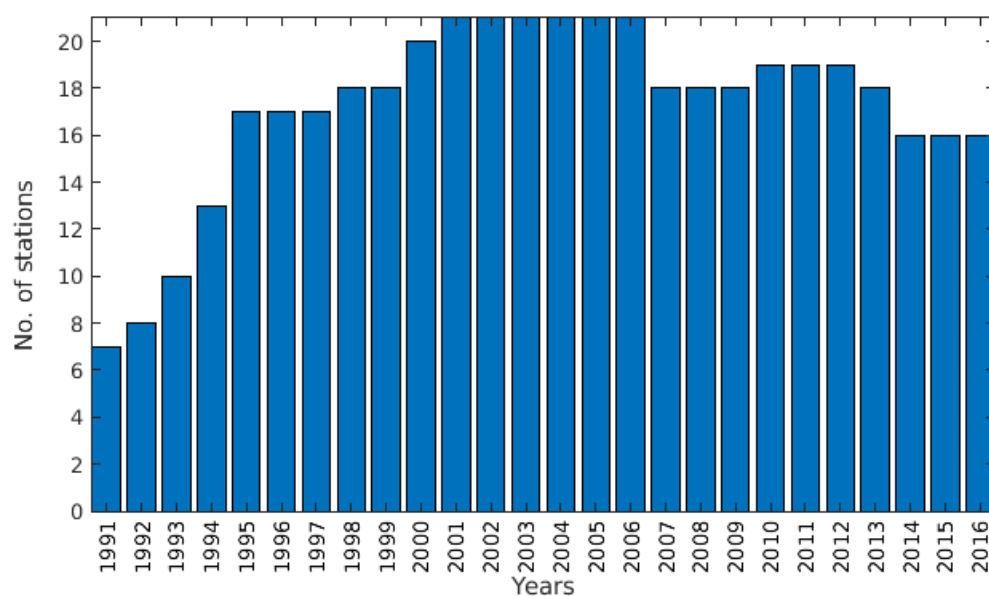

**Figure S2.** The number of air quality monitoring stations that observed SO<sub>2</sub> in HBA at each of 1991–2016.

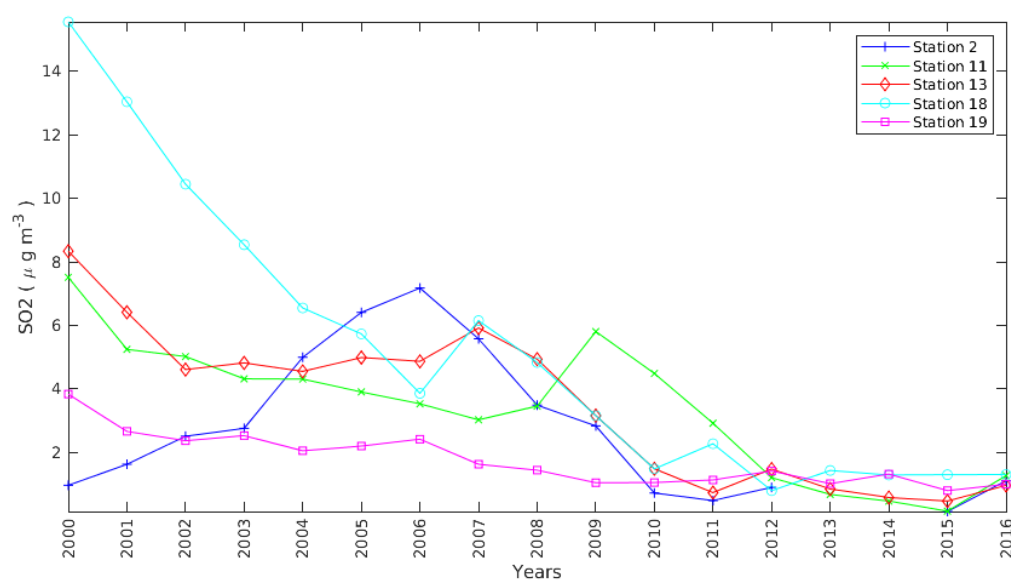

**Figure S3.** Annual means of SO<sub>2</sub> concentrations in a sample of five air quality monitoring stations in HBA. The station number corresponds to the numbers in Figure S1.

**Table S1.** Distribution of subjects by exposure to HBA-IAP and asthma.

| HBA-IAP category | N       | Asthma<br>Cases, %, CI |
|------------------|---------|------------------------|
| Non-HBA          | 2216927 | 130873, 5.9% (5.9-5.9) |
| 1                | 56480   | 3852, 6.8% (6.6-7.0)   |
| 2                | 56637   | 3897, 6.9% (6.7-7.1)   |
| 3                | 56587   | 3928, 6.9% (6.7-7.2)   |
| 4                | 56612   | 3411, 6.0% (5.8-6.2)   |

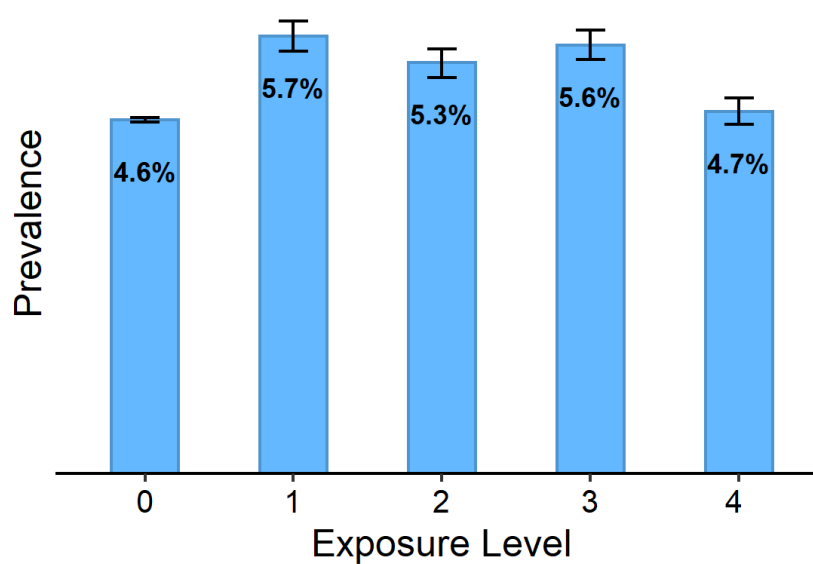**Figure S4.** Crude prevalence of rhinitis by HBA-IAP categories. 0= reference category (non-HBA residents), 1= lowest HBA-IAP exposure.

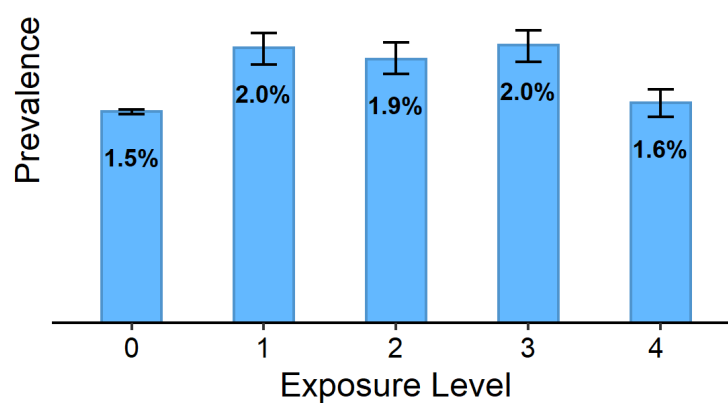

**Figure S5.** Crude prevalence of asthma with comorbid rhinitis by HBA-IAP categories. 0= reference category (non-HBA residents), 1= lowest HBA-IAP exposure.

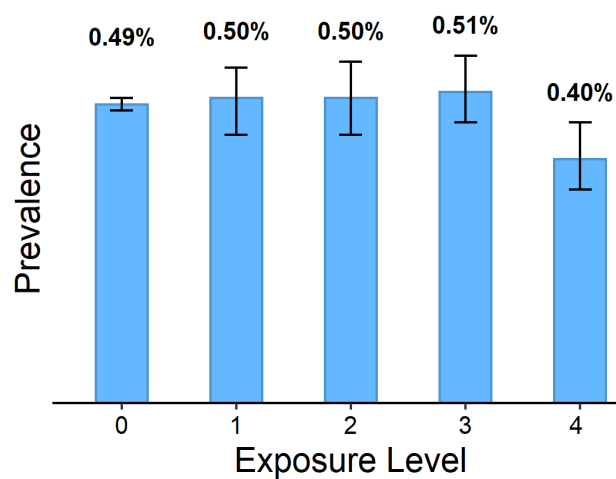

**Figure S6.** Crude prevalence of atopic dermatitis by HBA-IAP categories. 0= reference category (non-HBA residents), 1= lowest HBA-IAP exposure.

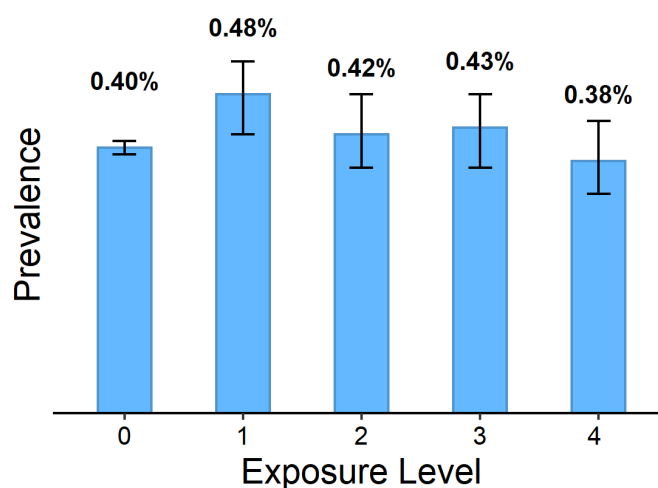

**Figure S7.** Crude prevalence of rhinoconjunctivitis by HBA-IAP categories. 0= reference category (non-HBA residents), 1= lowest HBA-IAP exposure.

**Table S2.** Distribution of subjects by exposure to HBA-IAP and additional atopic conditions.

| HBA-IAP category | Rhinitis Cases, %, CI    | Conjunctivitis Cases, %, CI | Dermatitis Cases, %, CI   | Rhinitis + Asthma, Cases, %, CI |
|------------------|--------------------------|-----------------------------|---------------------------|---------------------------------|
| Non-HBA          | 130873<br>5.9% (5.9-5.9) | 8884<br>0.4% (0.39-0.41)    | 10906<br>0.49% (0.48-0.5) | 34088<br>1.54% (1.52-1.55)      |
| 1                | 3852<br>6.8% (6.6-7.0)   | 269<br>0.48% (0.42-0.53)    | 281<br>0.5% (0.44-0.55)   | 1128<br>2.0% (1.88-2.11)        |
| 2                | 3897<br>6.9% (6.7-7.1)   | 241<br>0.42% (0.37-0.48)    | 284<br>0.5% (0.44-0.56)   | 1090<br>1.92% (1.81-2.04)       |
| 3                | 3928<br>6.9% (6.7-7.2)   | 243<br>0.43% (0.37-0.48)    | 292<br>0.52% (0.46-0.57)  | 1142<br>2.02% (1.9-2.13)        |
| 4                | 3411<br>6.0% (5.8-6.2)   | 218<br>0.38% (0.33-0.44)    | 230<br>0.41% (0.35-0.46)  | 906<br>1.6% (1.5-1.7)           |

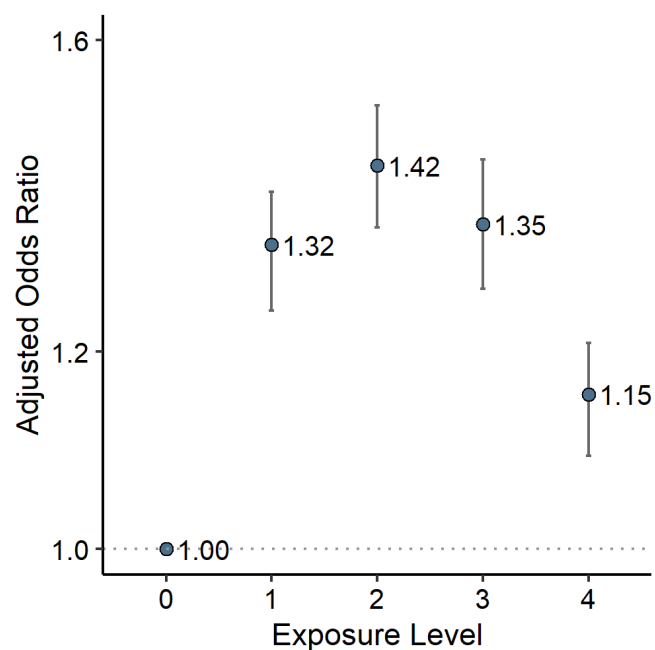

**Figure S8.** Association between HBA-IAP and asthma, adjusted for SES, year of birth, school orientation, NO<sub>x</sub> and PM<sub>2.5</sub>. N = 791,132, N = 57,573. 0= reference category (non-HBA residents), 1= lowest HBA-IAP exposure.

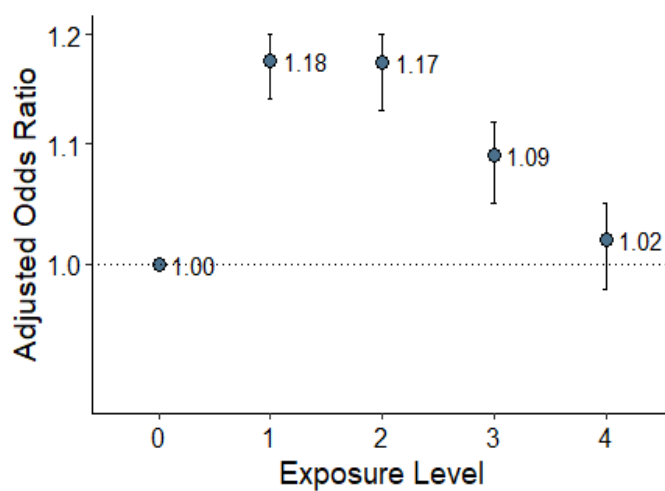

**Figure S9.** Association between HBA-IAP and asthma, adjusted for SES, year of birth, school orientation, NO<sub>x</sub>, and locality type. N= 2,294,152, N cases = 139,400. 0= reference category (non-HBA residents), 1= lowest HBA-IAP exposure.

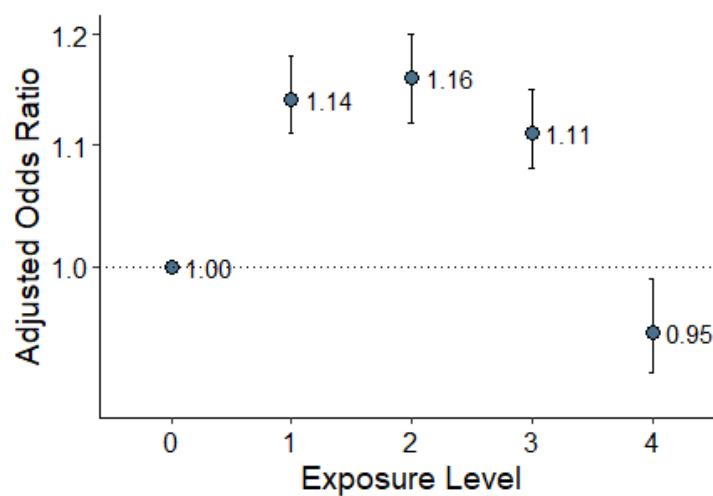

**Figure S10.** Association between HBA-IAP and asthma, adjusted for SES, year of birth, school orientation, NO<sub>x</sub>, and BMI category. N = 2,248,006, N cases = 139,419. 0 = reference category (non-HBA residents), 1 = lowest HBA-IAP exposure.

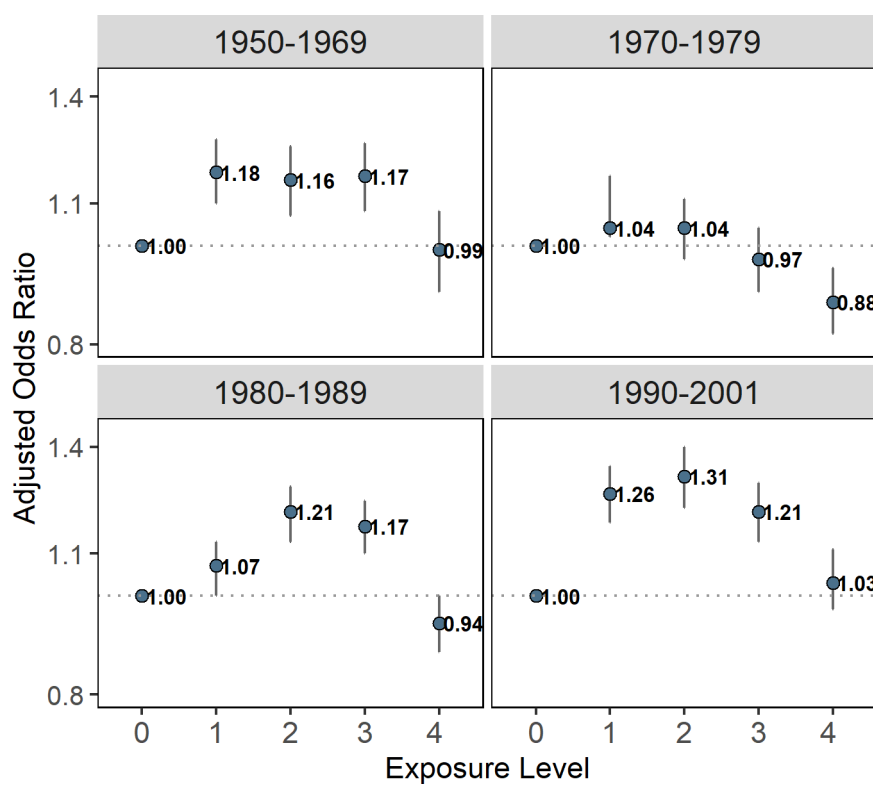

**Figure S11.** Association between HBA-IAP and asthma, stratified by the decade of birth and adjusted for SES, year of birth, school orientation, and NO<sub>x</sub>. 0 = reference category (non-HBA residents), 1 = lowest HBA-IAP exposure category.



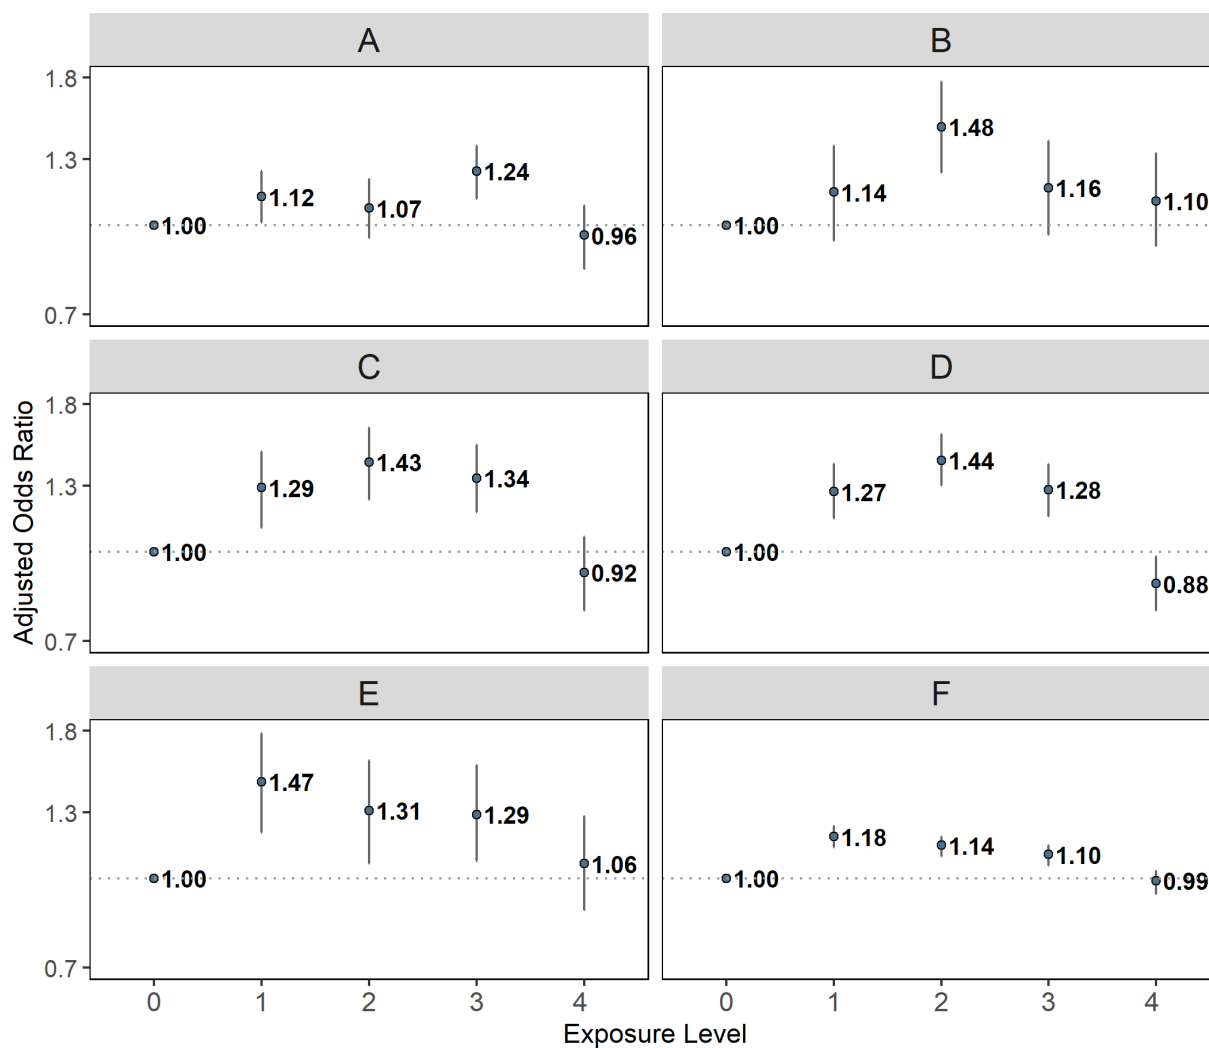

**Figure S12.** Association between HBA-IAP and asthma, stratified by parental region of birth and adjusted for SES, year of birth, and school orientation. A- both parents from Jewish "Ashkenazi" country (N= 147,121); B- one parent from Jewish "Ashkenazi" country and the other one Israeli-born (N= 61,636); C- one parent from Jewish "Ashkenazi" country and the other one from Jewish "Mizrahi" country (N= 86,759); D- both parents from Jewish "Mizrahi" country (N= 321,001); E- one parent from Jewish " Mizrahi" country and the other one Israeli-born (N= 79,002); F- all other participants (N= 1,828,226). 0= reference category (non-HBA residents), 1= lowest HBA-IAP exposure.

**Table S3.** Equal-interval HBA-IAP exposure (four groups).

| HBA-IAP category    | N         |
|---------------------|-----------|
| Reference (non-HBA) | 2,216,927 |
| 1                   | 63,298    |
| 2                   | 140,262   |
| 3                   | 20,301    |
| 4                   | 2,437     |

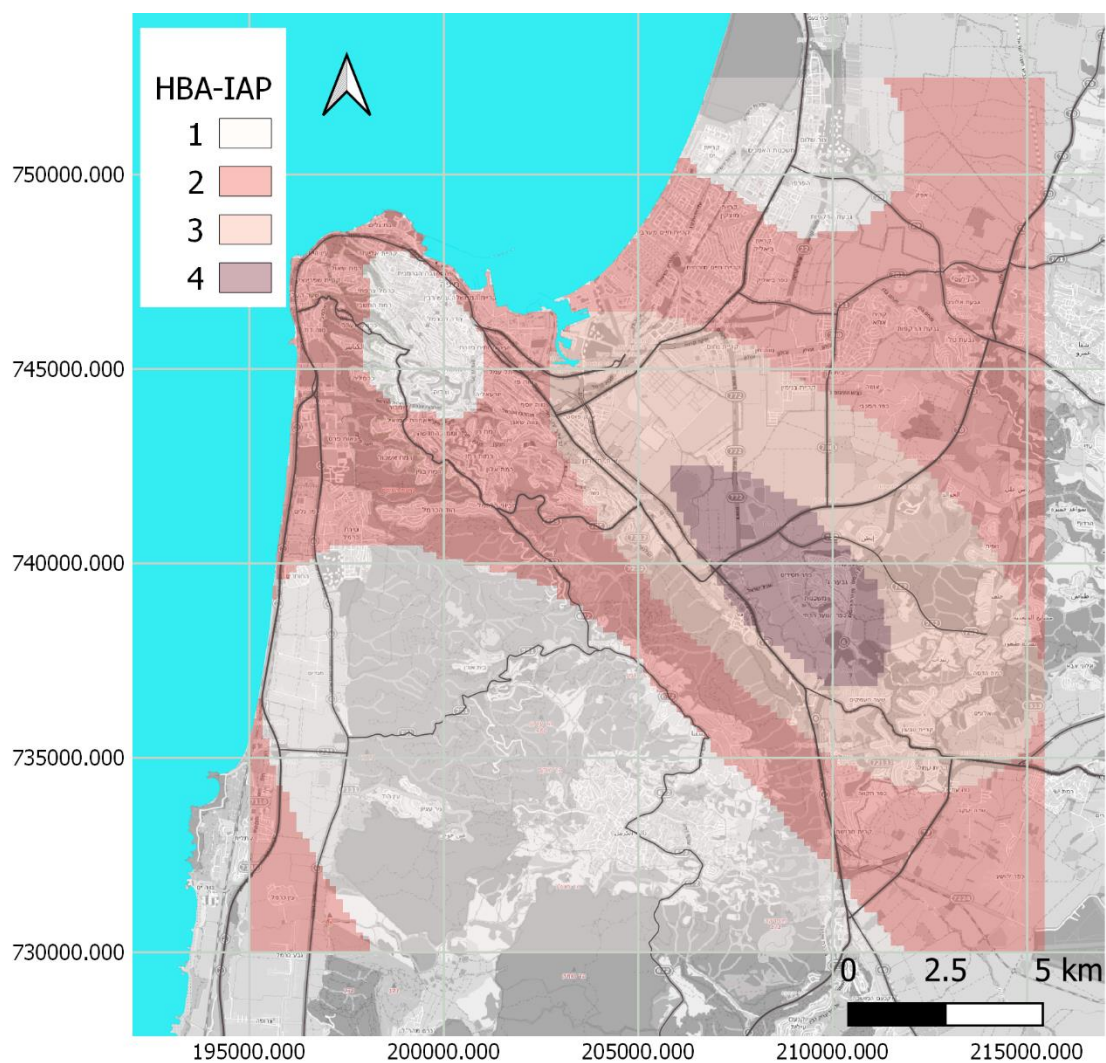

**Figure S13.** A map of the HBA-IAP exposure model with equal-interval color-coded exposure categories 1–4.

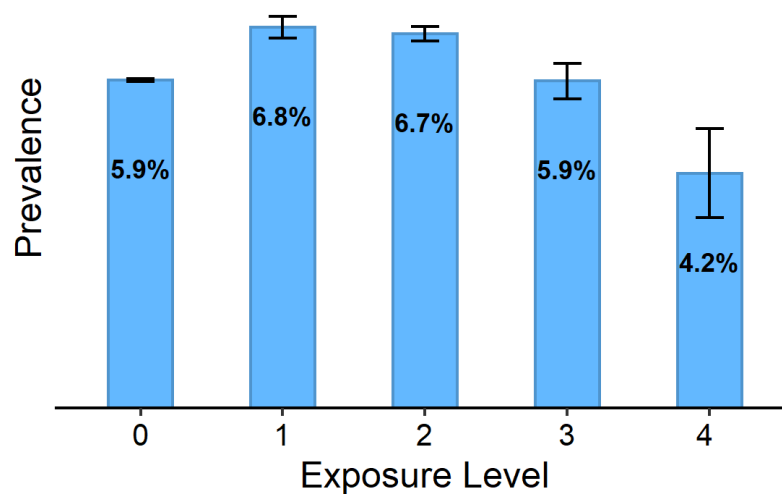

**Figure S14.** Crude prevalence of Asthma by HBA-IAP four equal-interval categories. 0= reference category (non-HBA residents), 1= lowest HBA-IAP exposure.

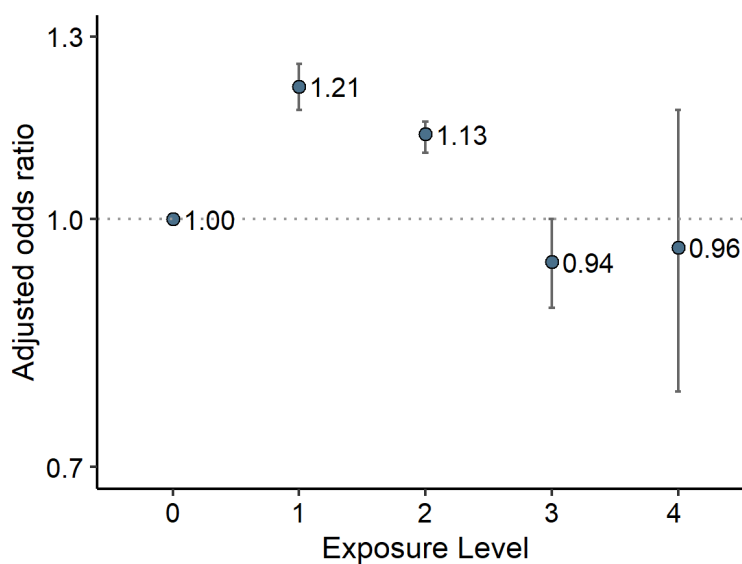

**Figure S15.** Association between HBA-IAP and asthma with four equal-interval categories, adjusted for SES, year of birth, and school orientation. 0= reference category (non-HBA residents), 1= lowest HBA-IAP exposure.



**Table S4.** Equal-interval HBA-IAP exposure (three groups).

| HBA-IAP category    | N         |
|---------------------|-----------|
| Reference (non-HBA) | 2,216,927 |
| 1                   | 130,156   |
| 2                   | 92,520    |
| 3                   | 3,640     |

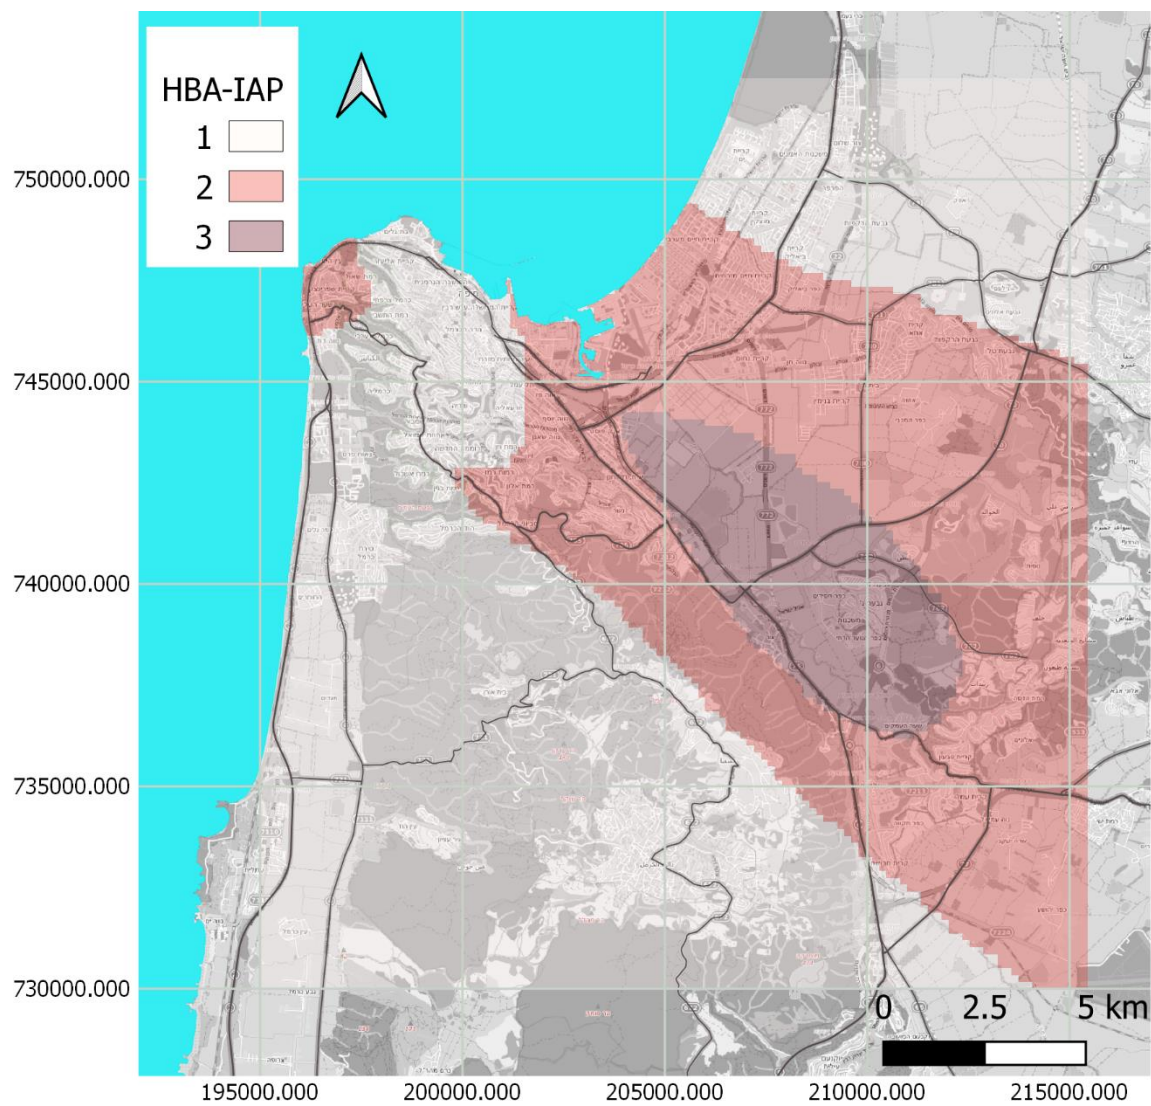**Figure S16.** A map of the HBA-IAP exposure model with equal-interval color-coded exposure categories 1–3.

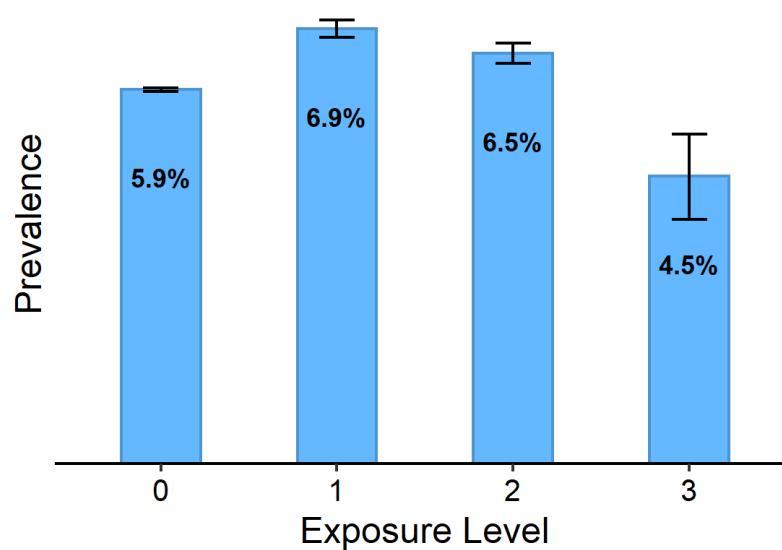

**Figure S17.** Crude prevalence of Asthma by HBA-IAP three equal-interval categories. 0= reference category (non-HBA residents), 1= lowest HBA-IAP exposure.

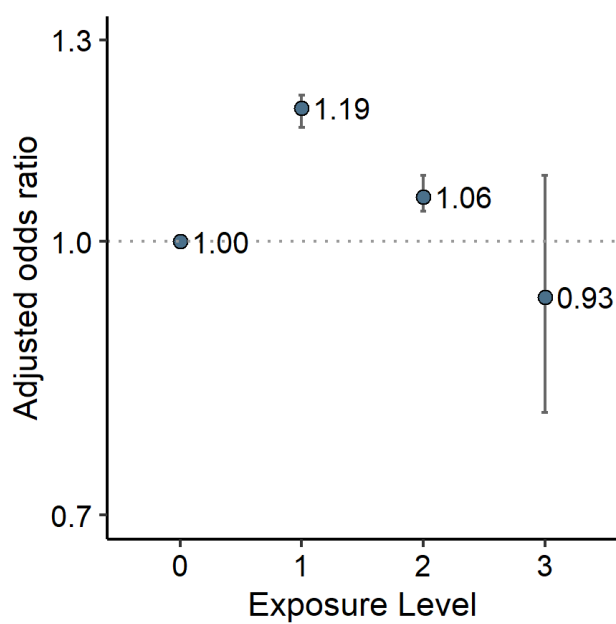

**Figure S18.** Association between HBA-IAP and asthma with three equal-interval categories, adjusted for SES, year of birth, and school orientation. 0= reference category (non-HBA residents), 1= lowest HBA-IAP exposure.
